# Supplementary material for: Exploiting the photocatalytic activity of gold nanoparticle-functionalized niobium oxide perovskites in nitroarene reductions
Source: Royal Society of Chemistry journal article supplement (doi:10.1039/c7cy01820g), 2017-01-01
Supplement: c7cy01820g1.pdf [file c7cy01820g1.pdf]

## SUPPORTING INFORMATION

### Exploiting the Photocatalytic Activity of Gold Nanoparticle- Functionalized Niobium Oxide Perovskites in Nitroarene Reductions

Emily K. Piggott,<sup>a</sup> Taylor O. Hope,<sup>a</sup> Bry W. Crabbe,<sup>a</sup> Pierre-Michel Jalbert,<sup>a,b</sup> Galina Orlova,<sup>a</sup> and Geniece L. Hallett-Tapley<sup>a,†</sup>

<sup>a</sup>Department of Chemistry, St. Francis Xavier University, P.O. Box 5000, Antigonish, Nova Scotia, B2G 2W5, Canada.

<sup>b</sup>Département de Chimie du Québec à Montréal, 2101, rue Jeanne-Mance, Montréal, Québec, H2X 2J6, Canada.

<sup>†</sup>Corresponding author: ghallett@stfx.ca

#### TABLE OF CONTENTS

|                                                                                                                                                                                                                                                                                                                                                                                                                                                                                                                                                                                                                                 |    |
|---------------------------------------------------------------------------------------------------------------------------------------------------------------------------------------------------------------------------------------------------------------------------------------------------------------------------------------------------------------------------------------------------------------------------------------------------------------------------------------------------------------------------------------------------------------------------------------------------------------------------------|----|
| <b>Figure S1.</b> TEM image of AuNP/NaNbO <sub>3</sub> .....                                                                                                                                                                                                                                                                                                                                                                                                                                                                                                                                                                    | S2 |
| <b>Figure S2.</b> Particle distribution of AuNP/KNbO <sub>3</sub> . .....                                                                                                                                                                                                                                                                                                                                                                                                                                                                                                                                                       | S2 |
| <b>Figure S3.</b> Reverse-phase HPLC chromatograms monitoring the UVA-initiated AuNP/KNbO <sub>3</sub> -catalyzed reduction of (a) 4-nitrobenzene ( <b>2</b> ), (b) 4-nitroacetophenone ( <b>4</b> ), and (c) 4-nitroanisole ( <b>5</b> ). HPLC of the reaction mixtures after 14 hr. of UVA light exposure are shown in red. HPLC chromatograms of the nitro starting materials (blue) and expected amino products (green) are also presented for comparison and were obtained using authentic commercial standards. Peaks denoted by (*) are unidentified and are not due to the starting material or product standards. .... | S3 |
| <b>Figure S4.</b> Calibration curves constructed using authentic aminoarene standards and used in the % yield calculations presented in Table 1: (a) 4-aminotoluene, (b) aniline, (c) 4-aminobenzoic acid, (d) 4-aminoacetophenone and (e) 4-aminoanisole.....                                                                                                                                                                                                                                                                                                                                                                  | S4 |
| <b>Figure S5.</b> Plot of (a) EA vs. $k_{photoredox}$ , (b) NO <sub>2</sub> natural charge vs. $k_{photoredox}$ and (c) $\epsilon$ LUMO vs. $k_{photoredox}$ . .....                                                                                                                                                                                                                                                                                                                                                                                                                                                            | S5 |
| <b>Figure S6.</b> Diffuse reflectance spectrum of AuNP/Mg(OH) <sub>2</sub> illustrating surface plasmon absorption of the AuNP dopant at 530 nm. Inset depicts a photo of the AuNP/Mg(OH) <sub>2</sub> catalyst synthesized using NaBH <sub>4</sub> as a chemical reductant .....                                                                                                                                                                                                                                                                                                                                               | S5 |
| <b>Figure S7.</b> UV-visible spectrum monitoring the photocatalytic reduction of 4-nitrotoluene ( <b>1</b> ) using AuNP/KNbO <sub>3</sub> (●) and AuNP/Mg(OH) <sub>2</sub> (○) following 6 hr of UVA irradiation. ....                                                                                                                                                                                                                                                                                                                                                                                                          | S6 |
| <b>Figure S8.</b> Photo of AuNP/KNbO <sub>3</sub> catalyst synthesized using NaBH <sub>4</sub> as a chemical reducing agent.....                                                                                                                                                                                                                                                                                                                                                                                                                                                                                                | S6 |

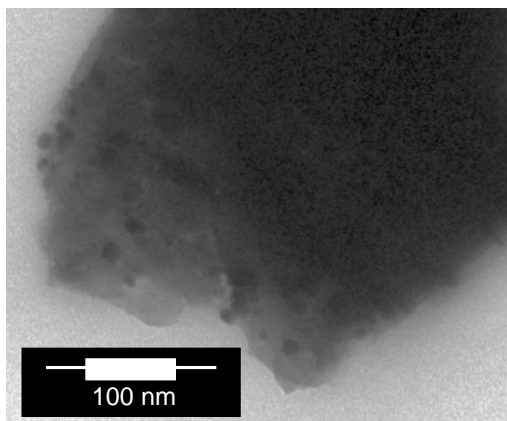

**Figure S1.** TEM image of AuNP/NaNbO<sub>3</sub>

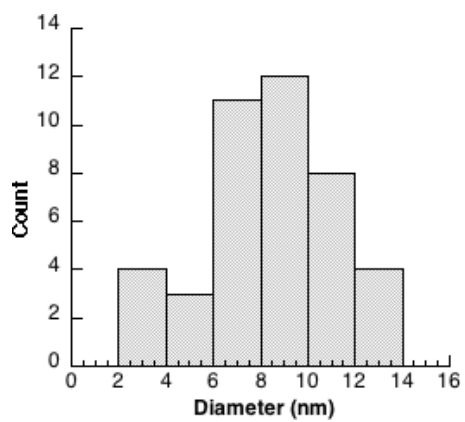

**Figure S2.** Particle distribution of AuNP/KNbO<sub>3</sub>. Average diameter:  $8.5 \pm 2.7$  nm.

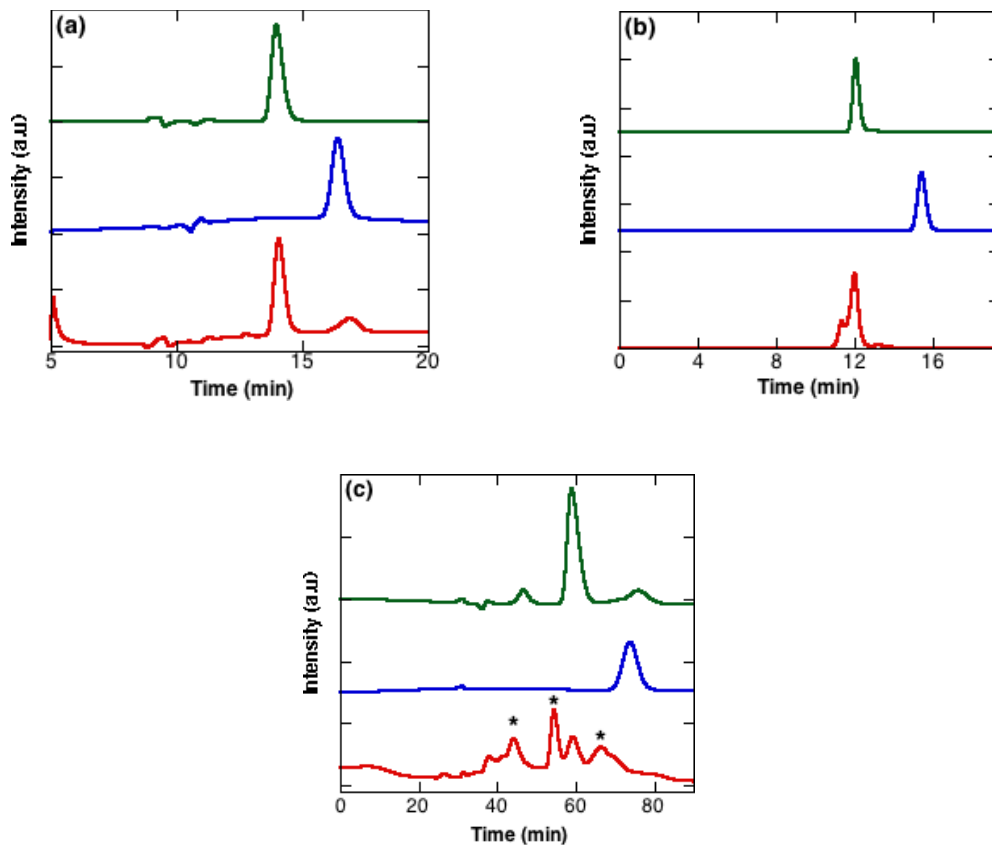

**Figure S3.** Reverse-phase HPLC chromatograms monitoring the UVA-initiated AuNP/KNbO<sub>3</sub>-catalyzed reduction of (a) 4-nitrobenzene (**2**), (b) 4-nitroacetophenone (**4**) and (c) 4-nitroanisole (**5**). HPLC of the reaction mixtures after 14 hr. of UVA light exposure are shown in red. HPLC chromatograms of the nitro starting materials (blue) and expected amino products (green) are also presented for comparison and were obtained using authentic commercial standards. Peaks denoted by (\*) are unidentified and are not due to the starting material or product standards.

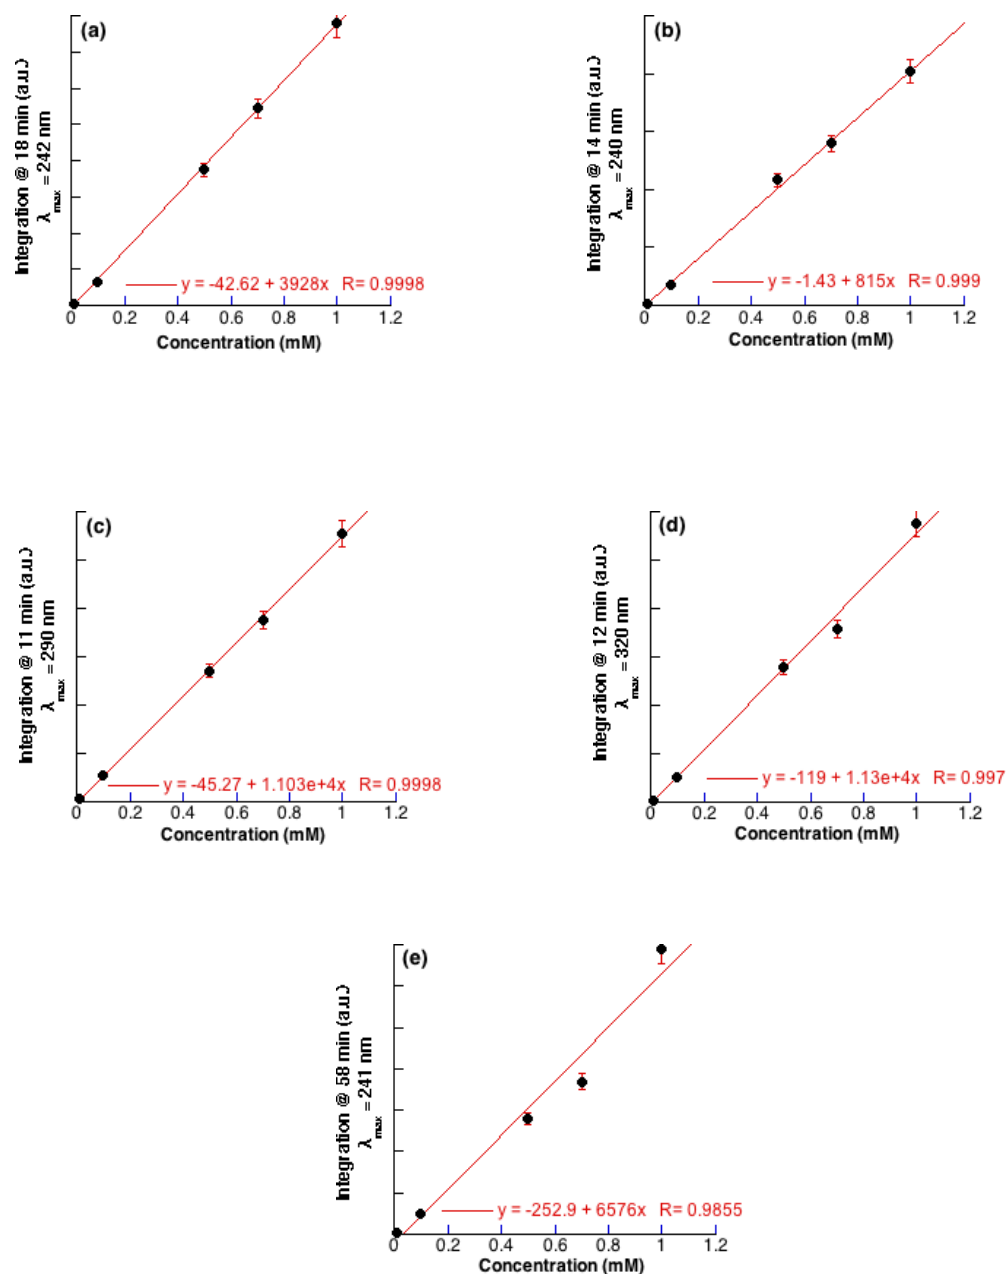

**Figure S4.** Calibration curves constructed using authentic aminoarene standards and used in the % yield calculations presented in Table 1: (a) 4-aminotoluene, (b) aniline, (c) 4-aminobenzoic acid, (d) 4-aminoacetophenone and (e) 4-aminoanisole.

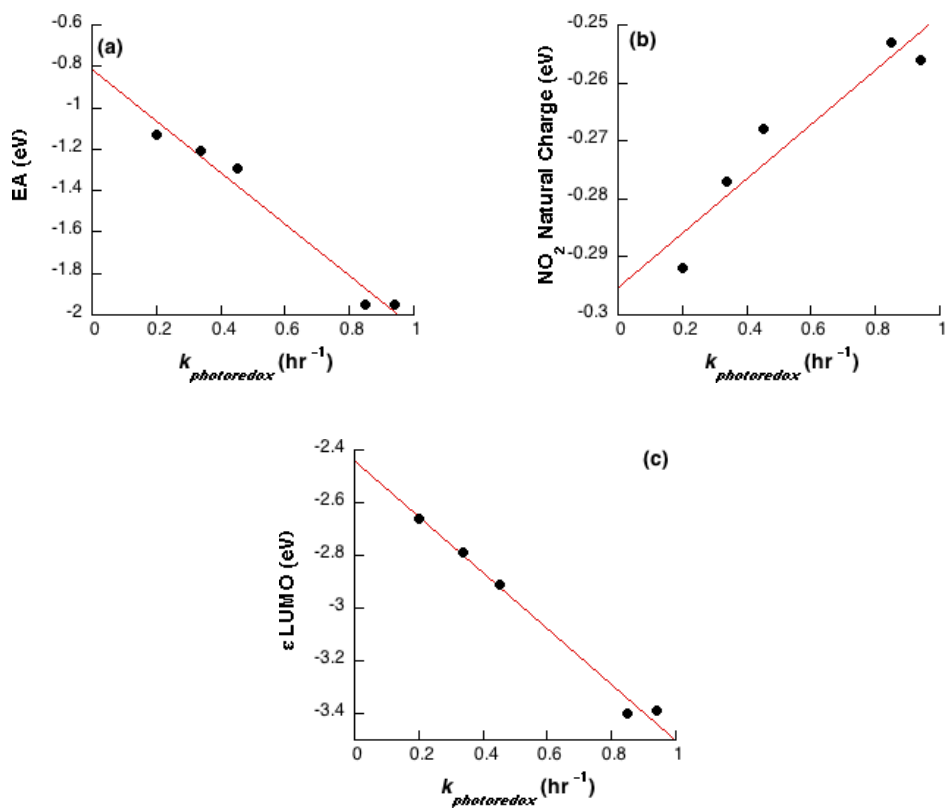

**Figure S5.** Plot of (a) EA vs.  $k_{\text{photoredox}}$ , (b)  $\text{NO}_2$  natural charge vs.  $k_{\text{photoredox}}$  and (c)  $\epsilon$  LUMO vs.  $k_{\text{photoredox}}$ .

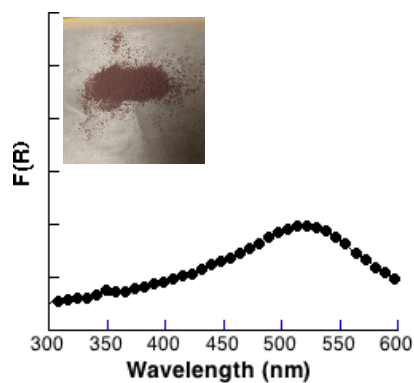

**Figure S6.** Diffuse reflectance spectrum of AuNP/Mg(OH)<sub>2</sub> illustrating surface plasmon absorption of the AuNP dopant at 530 nm. Inset depicts a photo of the AuNP/Mg(OH)<sub>2</sub> catalyst synthesized using NaBH<sub>4</sub> as a chemical reductant.

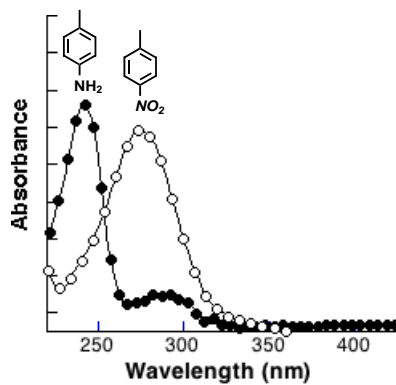

**Figure S7.** UV-visible spectrum monitoring the photocatalytic reduction of 4-nitrotoluene (**1**) using AuNP/KNbO<sub>3</sub> (●) and AuNP/Mg(OH)<sub>2</sub> (○) following 6 hr of UVA irradiation.

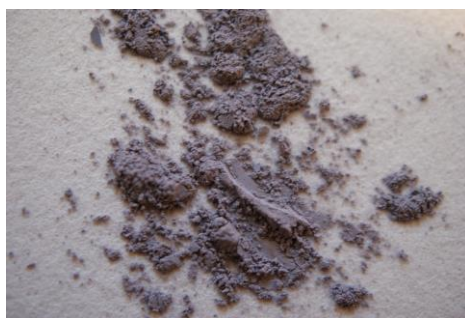

**Figure S8.** Photo of AuNP/KNbO<sub>3</sub> catalyst synthesized using NaBH<sub>4</sub> as a chemical reducing agent.
